# Supplementary material for: Fabrication of one-dimensional Cu2Te/Te nanorod composites and their enhanced thermoelectric properties
Source: Royal Society of Chemistry journal article supplement (doi:10.1039/c8ce01790e), 2018-11-27
Supplement: c8ce01790e1.pdf [file c8ce01790e1.pdf]

**Supplementary Information:**

**Facile fabrication of one-dimensional Te/Cu<sub>2</sub>Te nanorod composites with improved thermoelectric power factor and low thermal conductivity.**

Dabin Park, Hyun Ju, Taeseob Oh and Jooheon Kim\*

School of Chemical Engineering & Materials Science,

Chung-Ang University, Seoul 06974, Republic of Korea

\*Corresponding author: jooheonkim@cau.ac.kr (J. Kim)

Supporting Information Contents:

1. Figures

## 1. Figures

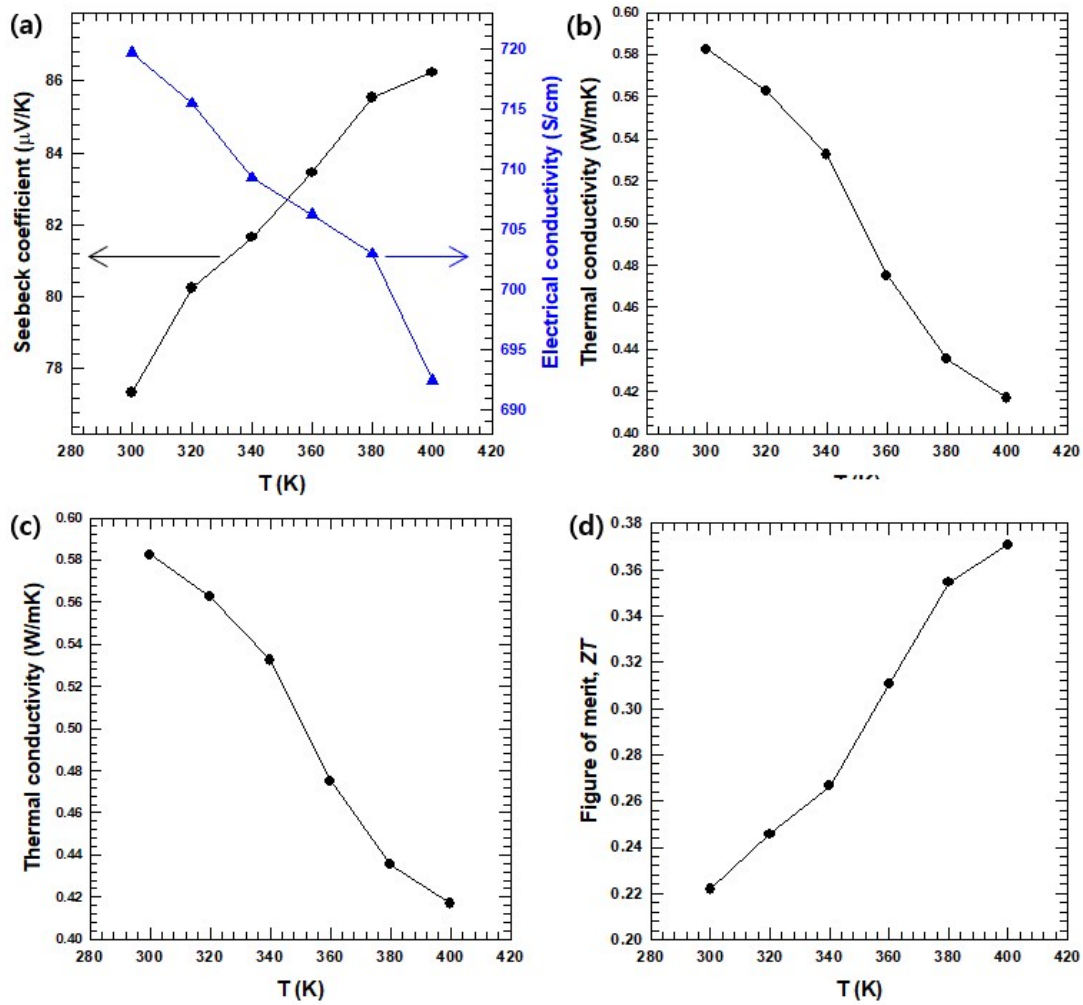

Fig. S1. (a) Seebeck coefficient, electrical conductivity, (b) thermal conductivity, (c) power factor and (d)  $ZT$  of 10 wt.% of  $\text{Cu}_2\text{Te}/\text{Te}$  nanorod composites with various temperature

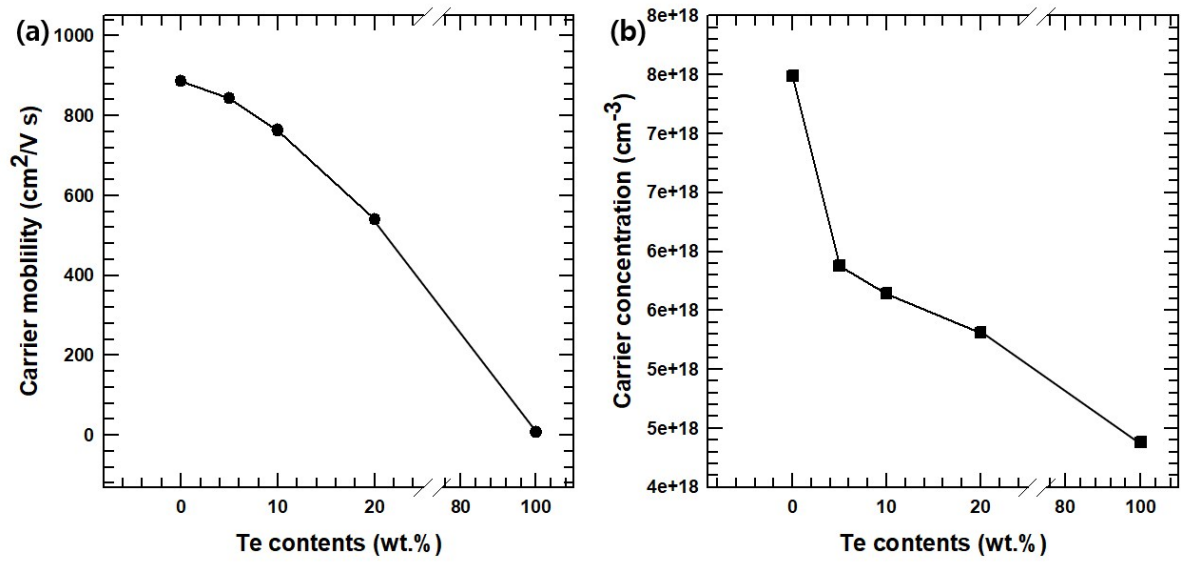

Figure. S2. (a) carrier mobility, and (b) carrier concentration of Cu<sub>2</sub>Te/Te nanorod composites with various Te contents
